# Supplementary material for: Giant Seebeck effect over 0.1 V K−1 – is this an intrinsic phenomenon in organic semiconductors?
Source: Royal Society of Chemistry journal article supplement (doi:10.1039/d3fd00127j), 2023-09-04
Supplement: d3fd00127j1.xlsx [file d3fd00127j1.xlsx]

## Sheet: Sheet1
Masakazu Nakamura et al., "Giant Seebeck Effect over 0.1 V/K – Is this an Intrinsic Phenomenon in Organic Semiconductors? – "
Table for Fig. 3
Material's name	Measurement temperature (K) *those not described are RT	Seebeck coefficient (V/K)	Polarity of Seebeck coefficient	Electrical conductivity (S/cm)	Reference *"-" means "same as above"
DPh-BTBT:C60F36		0.0012	1	6.5e-06	The authors group
pentacene by MBE		0.00036	1	0.00541	The authors group
pentacene:C60F36		0.00071	-1	7.2e-06	The authors group
pure pentacene		0.002431	-1	1.32e-06	The authors group
C60F36		0.00062	-1	1.22e-05	The authors group
C60		0.05752	1	7.11e-08	The authors group
C60		0.04692	1	7.11e-08	The authors group
F4TCNQ-layered pentacene		0.0002	1	0.43	The authors group
benzoporphyrin (BP)		0.000908	1	4e-05	The authors group
pureC60_2		0.12396	-1	2.91e-07	The authors group
C12BP		0.04123	1	8.13e-09	The authors group
PTB7:F4TCNQ		0.0006	1	3e-05	The authors group
BP (sublimed)_	360	0.09684	-1	1.97e-06	The authors group
C10-DNTT (sublimed)	300	0.06203	-1	2.39e-08	The authors group
C10-DNTT (sublimed)	315	0.12801	-1	1.11e-07	The authors group
C10-DNTT (sublimed)	330	0.04093	-1	3.3e-07	The authors group
C10-DNTT (sublimed)	345	0.02262	-1	6.74e-07	The authors group
C10-DNTT (sublimed)	360	0.02287	-1	1.3e-06	The authors group
pentacene	300	0.00191	-1	2.64e-09	The authors group
pentacene	315	0.00335	-1	1.12e-08	The authors group
pentacene	330	0.0225	-1	2.98e-08	The authors group
pentacene	345	0.0414	-1	1.11e-07	The authors group
pentacene	360	0.0159	-1	2.33e-07	The authors group
C12BP	300	0.00025886	-1	1e-09	The authors group
C12BP	340	0.12258	-1	2.98e-08	The authors group
C12BP	360	0.01876	-1	1.11e-07	The authors group
DNTT (sublimed)	300	0.03634	-1	1.35e-10	The authors group
DNTT (sublimed)	315	0.0057	-1	2.52e-10	The authors group
DNTT (sublimed)	330	0.01209	-1	1.12e-09	The authors group
DNTT (sublimed)	345	0.02078	-1	2.91e-09	The authors group
DNTT (sublimed)	360	0.03491	-1	8.28e-09	The authors group
BP	300	0.12465	-1	2.65e-09	The authors group
BP	315	0.08691	-1	6.24e-09	The authors group
BP	330	0.03883	-1	2.26e-08	The authors group
BP	345	0.00735	1	4.16e-08	The authors group
BP	360	0.0088	-1	1.92e-07	The authors group
C12BP	300	0.01322	-1	6.36e-11	The authors group
C12BP	310	0.01525	-1	4.45e-10	The authors group
C12BP	320	0.01812	-1	1.14e-09	The authors group
C12BP	330	0.01071	-1	2.36e-09	The authors group
C12BP	340	0.02049	-1	5.09e-09	The authors group
C12BP	350	0.02281	-1	1.08e-08	The authors group
C12BP	360	0.07726	-1	2.31e-08	The authors group
C60	300	0.16955	-1	6.6e-09	The authors group
C60	315	0.021056	-1	2.14e-08	The authors group
C60	330	0.0012002	-1	6.43e-08	The authors group
C60	345	0.0023304	-1	1.59e-07	The authors group
C60	360	0.0041949	-1	3.53e-07	The authors group
BP_2	300	0.01559	-1	2.12e-07	The authors group
BP_2	315	0.00409	-1	4.33e-07	The authors group
BP_2	330	0.038302	-1	8.89e-07	The authors group
BP_2	345	0.038162	-1	1.3e-06	The authors group
BP_2	360	0.09684	-1	1.97e-06	The authors group
C8BTBT	300	0.0052	-1	3.67e-11	The authors group
C8BTBT	315	0.0129	-1	2.06e-10	The authors group
C8BTBT	330	0.00358	-1	6.94e-10	The authors group
C8BTBT	345	0.0691	-1	2.23e-09	The authors group
C8BTBT	360	0.0101	-1	7.96e-09	The authors group
C12BP (sublimed)	300	0.01349	-1	2.74e-09	The authors group
C12BP (sublimed)	320	0.01056	-1	8.97e-09	The authors group
C12BP (sublimed)	340	0.006784	-1	2.75e-08	The authors group
C12BP (sublimed)	350	0.004016	1	5.17e-08	The authors group
C12BP (sublimed)	360	0.011895	-1	1.31e-07	The authors group
C12BP (sublimed)	370	0.0432	1	2.43e-07	The authors group
C12BP (sublimed)	380	0.0004179	1	4.85e-07	The authors group
C12BP (sublimed)	400	0.002928	1	1.96e-06	The authors group
PDI (sublimed)	260	0.0006214	1	1.44e-05	The authors group
PDI (sublimed)	280	0.00065323	1	3.66e-05	The authors group
PDI (sublimed)	300	0.00065434	1	8.6e-05	The authors group
PDI (sublimed)	315	0.00065087	1	0.0001526	The authors group
PDI (sublimed)	330	0.00064188	1	0.0002685	The authors group
PDI (sublimed)	345	0.00062589	1	0.00040249	The authors group
PDI (sublimed)	360	0.00061321	1	0.00056645	The authors group
PDI (sublimed)	375	0.00060888	1	0.00077281	The authors group
PDI (sublimed)	390	0.00059657	1	0.0010252	The authors group
PDI (sublimed)	405	0.00061748	1	0.0012658	The authors group
C8PDI	300	0.0043239	-1	3.77e-09	The authors group
C8PDI	315	0.00020294	-1	1.16e-08	The authors group
C8PDI	330	0.00023299	-1	2.47e-08	The authors group
C8PDI	345	0.0029016	-1	4.96e-08	The authors group
C8PDI	360	0.0029773	-1	2.23e-07	The authors group
PDA (sublimed)	390	0.00056354	-1	0.000271	The authors group
PDA (sublimed)	260	0.00063009	-1	4.79e-06	The authors group
PDA (sublimed)	280	0.00061252	-1	1.25e-05	The authors group
PDA (sublimed)	300	0.0006102	-1	2.42e-05	The authors group
PDA (sublimed)	315	0.0006042	-1	4.09e-05	The authors group
PDA (sublimed)	330	0.00059571	-1	6.67e-05	The authors group
PDA (sublimed)	345	0.00058791	-1	0.000102	The authors group
PDA (sublimed)	360	0.00058069	-1	0.000147	The authors group
PDA (sublimed)	375	0.00055916	-1	0.000215	The authors group
PDA (sublimed)	390	0.00056354	-1	0.000271	The authors group
PDA (sublimed)	405	0.0005729	-1	0.00033	The authors group
Pentacene_(sublimed)(FF)_2nd	300	0.002718	-1	8.18e-11	The authors group
Pentacene_(sublimed)(FF)_2nd	315	0.001248	-1	1.94e-10	The authors group
Pentacene_(sublimed)(FF)_2nd	330	0.01769	1	3.87e-10	The authors group
Pentacene_(sublimed)(FF)_2nd	345	0.044999	1	1.32e-09	The authors group
Pentacene_(sublimed)(FF)_2nd	360	0.018656	1	4.38e-09	The authors group
Pentacene_(sublimed)(FF)_2nd	375	0.002958	-1	1.06e-08	The authors group
Pentacene_(sublimed)(FF)_2nd	390	0.003598	-1	3.69e-08	The authors group
Pentacene_(sublimed)(FF)_2nd	320	0.003424	-1	1.16e-10	The authors group
Pentacene_(sublimed)(FF)_2nd	325	0.019169	1	1.73e-10	The authors group
Pentacene_(sublimed)(FF)_2nd	330	0.015959	1	1.23e-10	The authors group
Pentacene_(sublimed)(FF)_2nd	335	0.028741	1	2.44e-10	The authors group
Pentacene_(sublimed)(FF)_2nd	340	0.032898	1	8.58e-10	The authors group
Pentacene_(sublimed)(FF)_2nd	345	0.087567	1	1.32e-09	The authors group
Pentacene_(sublimed)(FF)_2nd	350	0.021201	1	1.43e-09	The authors group
sumanen (sublimed)	300	0.0061861	-1	1.64e-10	The authors group
sumanen (sublimed)	310	0.0050604	-1	2.38e-10	The authors group
sumanen (sublimed)	320	0.0303272	-1	7.12e-10	The authors group
pentacene_pellet	298	0.000759	1	1.21e-09	The authors group
PDI(single_crystal)	290	0.02778	-1	1.11e-11	The authors group
PDI(single_crystal)	300	0.0317	-1	8.302e-11	The authors group
PDI(single_crystal)	315	0.01354	-1	1.589e-10	The authors group
PDI(single_crystal)	330	0.004906	-1	4.697e-10	The authors group
PDI(single_crystal)	360	0.001846	-1	2.197e-09	The authors group
BP(single_crystal)	330	0.0107	-1	1.27e-11	The authors group
BP(single_crystal)	337.5	0.0287	-1	2.2e-11	The authors group
BP(single_crystal)	345	0.0168	-1	4.63e-11	The authors group
BP(single_crystal)	352.5	0.015	-1	8.71e-11	The authors group
BP(single_crystal)	360	0.0099	-1	1.64e-10	The authors group
BP(single_crystal)	367.5	0.0027	-1	5.04e-10	The authors group
Rubrene(single_crystal)	285	0.01709	-1	8.39e-12	The authors group
Rubrene(single_crystal)	300	0.0207	-1	9.58e-12	The authors group
Rubrene(single_crystal)	315	0.0051	-1	3.75e-11	The authors group
Rubrene(single_crystal)	330	0.00314	-1	8.34e-11	The authors group
Rubrene(single_crystal)	360	0.00102	-1	7.68e-10	The authors group
Rubrene(single_crystal)illumination_0.031831927	300	0.01709	-1	8.39e-12	The authors group
Rubrene(single_crystal)illumination_0.10504536	300	0.0207	-1	9.58e-12	The authors group
Rubrene(single_crystal)illumination_0.238739456	300	0.0051	-1	3.75e-11	The authors group
Rubrene(single_crystal)illumination_0.693936018	300	0.00314	-1	8.34e-11	The authors group
Rubrene(single_crystal)illumination_3.08769696	300	0.00082	1	1.04e-10	The authors group
Rubrene(single_crystal)illumination_7.957981856	300	0.00102	1	7.68e-10	The authors group
Rubrene(single_crystal)illumination_sampleA_0	350	0.09995	-1	1.2732e-11	The authors group
Rubrene(single_crystal)illumination_sampleA_2.28014E-06	350	0.058905	-1	2.3867e-11	The authors group
Rubrene(single_crystal)illumination_sampleA_2.37295E-05	350	0.030065	-1	8.0762e-11	The authors group
Rubrene(single_crystal)illumination_sampleA_0.000249838	350	0.007205	-1	3.4575e-10	The authors group
Rubrene(single_crystal)illumination_sampleA_0.00303	350	0.00138231	-1	1.5312e-09	The authors group
Rubrene(single_crystal)illumination_sampleA_0.074374976	350	0.074725	1	6.0553e-09	The authors group
Rubrene(single_crystal)illumination_sampleA_0.242296761	350	0.069455	1	8.8249e-09	The authors group
Rubrene(single_crystal)illumination_sampleA_0.025191156	350	0.062875	1	2.1803e-11	The authors group
Rubrene(single_crystal)illumination_sampleA_0.012146077	350	0.069055	1	2.4122e-13	The authors group
Rubrene(single_crystal)illumination_sampleA_0.007091856	350	0.07355	1	2.6356e-13	The authors group
Rubrene(single_crystal)illumination_sampleA_0.003947034	350	0.07385	1	8.6743e-14	The authors group
Rubrene(single_crystal)illumination_sampleA_0	350	0.03227	1	1.7494e-11	The authors group
Rubrene(single_crystal)illumination_sampleB_0	350	0.11836	-1	5.4116e-12	The authors group
Rubrene(single_crystal)illumination_sampleB_2.28675E-06	350	0.10068	1	1.03356e-11	The authors group
Rubrene(single_crystal)illumination_sampleB_2.37324E-05	350	0.13658	1	1.4868e-11	The authors group
Rubrene(single_crystal)illumination_sampleB_0.003029239	350	0.10986	1	2.33605e-10	The authors group
Rubrene(single_crystal)illumination_sampleB_0.074124287	350	0.081165	1	1.17191e-09	The authors group
Rubrene(single_crystal)illumination_sampleB_0.360590961	350	0.05871	1	1.99725e-09	The authors group
Rubrene(single_crystal)illumination_sampleB_0.240322445	350	0.067698	1	1.87195e-09	The authors group
Rubrene(single_crystal)illumination_sampleB_0.025165004	350	0.071793	1	6.4576e-10	The authors group
Rubrene(single_crystal)illumination_sampleB_0.0002504	350	0.072784	1	5.2326e-11	The authors group
Rubrene(single_crystal)illumination_sampleB_0	350	0.07042	1	5.4804e-12	The authors group
Rubrene(single_crystal)illumination_sampleC_0	350	0.03794	1	4.1545e-11	The authors group
Rubrene(single_crystal)illumination_sampleC_2.28508E-06	350	0.0061446	1	5.8357e-11	The authors group
Rubrene(single_crystal)illumination_sampleC_2.38018E-05	350	0.0011077	1	1.2513e-10	The authors group
Rubrene(single_crystal)illumination_sampleC_0.025170554	350	0.00091735	-1	2.8952e-09	The authors group
Rubrene(single_crystal)illumination_sampleC_0.35804461	350	0.00090007	-1	4.445e-09	The authors group
Rubrene(single_crystal)illumination_sampleC_0.073230751	350	0.00088882	-1	2.9597e-09	The authors group
Rubrene(single_crystal)illumination_sampleC_0.003037342	350	0.00013157	-1	8.2546e-10	The authors group
Rubrene(single_crystal)illumination_sampleC_0.001378292	350	0.0006751	1	5.188e-10	The authors group
Rubrene(single_crystal)illumination_sampleC_2.38153E-05	350	0.012637	1	8.284e-11	The authors group
Rubrene(single_crystal)illumination_sampleC_0	350	0.04428	1	3.1244e-11	The authors group
Rubrene(single_crystal)illumination_sampleD_0	350	0.044431	-1	3.0157e-12	The authors group
Rubrene(single_crystal)illumination_sampleD_2.2993E-06	350	0.0013436	1	1.5114e-11	The authors group
Rubrene(single_crystal)illumination_sampleD_2.38691E-05	350	0.00067712	-1	8.3766e-11	The authors group
Rubrene(single_crystal)illumination_sampleD_0.000251309	350	0.0011759	1	3.4175e-10	The authors group
Rubrene(single_crystal)illumination_sampleD_0.025203255	350	0.00094958	1	3.1101e-09	The authors group
Rubrene(single_crystal)illumination_sampleD_0.146364816	350	0.00094336	1	4.5771e-09	The authors group
Rubrene(single_crystal)illumination_sampleD_0.241637448	350	0.00194336	1	5.399e-09	The authors group
Rubrene(single_crystal)illumination_sampleD_0.416331911	350	0.0010441	1	4.9353e-09	The authors group
Rubrene(single_crystal)illumination_sampleD_0.07418931	350	0.0011005	1	2.752e-09	The authors group
Rubrene(single_crystal)illumination_sampleD_0.001383813	350	0.0012194	1	3.8353e-10	The authors group
Rubrene(single_crystal)illumination_sampleD_2.30011E-06	350	0.024069	-1	1.1636e-11	The authors group
Rubrene(single_crystal)illumination_sampleD_0W	350	0.03115	-1	5.2538e-12	The authors group
Rubrene(single_crystal)illumination_sampleE_0W	350	0.062592	1	2.7939e-11	The authors group
Rubrene(single_crystal)illumination_sampleE_2.28548E-06	350	0.01993	1	5.9786e-11	The authors group
Rubrene(single_crystal)illumination_sampleE_0.00025046	350	0.0043337	1	7.0223e-10	The authors group
Rubrene(single_crystal)illumination_sampleE_0.003031559	350	0.0010152	1	2.7941e-09	The authors group
Rubrene(single_crystal)illumination_sampleE_0.35963243	350	0.00066988	-1	1.1567e-08	The authors group
Rubrene(single_crystal)illumination_sampleE_0.025146254	350	1.3266e-05	1	5.0494e-09	The authors group
Rubrene(single_crystal)illumination_sampleE_0.000122488	350	0.0084722	1	3.4952e-10	The authors group
Rubrene(single_crystal)illumination_sampleE_2.29235E-06	350	0.049318	1	5.0147e-11	The authors group
Rubrene(single_crystal)illumination_sampleE_0W	350	0.085133	1	2.8209e-11	The authors group
TBT-Se_(single_crystal)	320	0.1267	-1	1.39e-12	The authors group
TBT-Se_(single_crystal)	325	0.091	-1	2.65e-12	The authors group
TBT-Se_(single_crystal)	330	0.0323	-1	3.58e-12	The authors group
TBT-Se_(single_crystal)	335	0.036	-1	5.33e-12	The authors group
TBT-Se_(single_crystal)	340	0.0203	-1	1.18e-11	The authors group
TBT-Se_(single_crystal)	345	0.0113	-1	1.73e-11	The authors group
TBT-Se_(single_crystal)	350	0.00374	-1	2.98e-11	The authors group
TBT-S_(single_crystal)	320	0.146	-1	2.56e-12	The authors group
TBT-S_(single_crystal)	330	0.0482	-1	4.74e-12	The authors group
TBT-S_(single_crystal)	335	0.0267	-1	8.99e-12	The authors group
TBT-S_(single_crystal)	340	0.01372	-1	1.76e-11	The authors group
TBT-S_(single_crystal)	350	0.00493	-1	4.53e-11	The authors group
TBT-O_(single_crystal)	315	0.1394	-1	1.64e-12	The authors group
TBT-O_(single_crystal)	320	0.1086	-1	3.16e-12	The authors group
TBT-O_(single_crystal)	330	0.0461	-1	1.02e-11	The authors group
TBT-O_(single_crystal)	340	0.00809	-1	2.41e-11	The authors group
TBT-O_(single_crystal)	350	0.0018	-1	5.42e-11	The authors group
TBT-SFF_(single_crystal)	320	0.1057	-1	2.13e-12	The authors group
TBT-SFF_(single_crystal)	330	0.0429	-1	8.85e-12	The authors group
TBT-SFF_(single_crystal)	340	0.0116	-1	1.57e-11	The authors group
TBT-SFF_(single_crystal)	350	0.00201	-1	3.52e-11	The authors group
SeBSe-S_(single_crystal)	320	0.1018	-1	3.25e-12	The authors group
SeBSe-S_(single_crystal)	330	0.05295	-1	1.13e-11	The authors group
SeBSe-S_(single_crystal)	340	0.02056	-1	2.5e-11	The authors group
SeBSe-S_(single_crystal)	350	0.00233	-1	5.37e-11	The authors group
SeBSe-Se_(single_crystal)	320	0.1048	-1	1.65e-12	The authors group
SeBSe-Se_(single_crystal)	330	0.0468	-1	4.98e-12	The authors group
SeBSe-Se_(single_crystal)	340	0.0236	-1	9.79e-12	The authors group
SeBSe-Se_(single_crystal)	350	0.00816	-1	2.56e-11	The authors group
C60:Cr2(hpp)4_1		0.000578	-1	0.113	T. Menke et al., https://doi.org/10.1063/1.3689778.
C60:Cr2(hpp)4_2		0.0003068	-1	0.454	-
C60:Cr2(hpp)4_3		0.000305	-1	0.55	-
C60:Cr2(hpp)4_4		0.0002691	-1	0.996	-
C60:Cr2(hpp)4_5		0.0002862	-1	1.04	-
C60:Cr2(hpp)4_6		0.0002763	-1	2.04	-
C60:Cr2(hpp)4_7		0.0001758	-1	4.31	-
C60:Cr2(hpp)4_8		0.0001722	-1	3.99	-
C60:Cr2(hpp)4_9		0.0001471	-1	3.81	-
C60:Cr2(hpp)4_10		0.0001274	-1	2.75	-
C60:Cr2(hpp)4_11		0.0001247	-1	1.3	-
C60:W2(hpp)4_1		0.000535	-1	0.0759	-
C60:W2(hpp)4_2		0.0004115	-1	0.255	-
C60:W2(hpp)4_3		0.0003373	-1	0.409	-
C60:W2(hpp)4_4		0.0003685	-1	0.379	-
C60:W2(hpp)4_5		0.0001902	-1	1.52	-
C60:W2(hpp)4_6		0.0001552	-1	2.38	-
C60:W2(hpp)4_7		0.0001337	-1	4.19	-
C60:W2(hpp)4_8		0.0001184	-1	3.36	-
C60:W2(hpp)4_9		9.289e-05	-1	1.5	-
C60:Cs2CO3		0.001715	-1	4e-05	A. Barbot et al., http://dx.doi.org/10.1007/s10853-012-6824-1.
(BEDT-TTF)3Cl2		1.5e-05	1	50	S. Demishev et al., Amer. Inst. of Phys. 89, 182(1998).
vanadyl-phthalocyanine doped F4-TCNQ 1:50		0.0007	1	0.0002	M. Pfeiffer et al., https://doi.org/10.1063/1.122718.
vanadyl-phthalocyanine doped F4-TCNQ 1:100		0.0008	1	2e-05	-
vanadyl-phthalocyanine doped F4-TCNQ 1:200		0.00082	1	8e-06	-
vanadyl-phthalocyanine doped F4-TCNQ 1:310		0.00084	1	7e-06	-
vanadyl-phthalocyanine doped F4-TCNQ 1:360		0.00092	1	2.1e-06	-
vanadyl-phthalocyanine doped F4-TCNQ 1:520		0.00092	1	1.6e-06	-
PMeOPV		3.8e-05	1	50	-
t-(EDO-S,S-DMEDT-TTF)2(AuBr2)1+y		9e-05	-1	62.5	H. Yoshino et al., https://doi.org/10.1007/s10973-007-8970-2.
Pentacene doped F4-TCNQ 0.5%		0.0004	1	0.002	K. Harada et al., https://doi.org/10.1063/1.3456394.
Pentacene doped F4-TCNQ 2%		0.00028	1	0.01	-
Pentacene doped F4-TCNQ 4%		0.00015	1	0.04	-
Pentacene doped F4-TCNQ 10%		0.00014	1	0.02	-
C60(18nm) with Cs2CO3		0.00014	-1	1.5	M. Sumino et al., https://doi.org/10.1063/1.3631633.
C60(22nm) with Cs2CO3		0.00011	-1	4	-
C60(29nm) with Cs2CO3		0.00014	-1	5	-
C60(49nm) with Cs2CO3		0.000195	-1	4	-
C60(68nm) with Cs2CO3		0.0002	-1	2	-
C60(100nm) with Cs2CO3		0.00022	-1	1	-
2,7-carbazole based copolymers [A]		5.3e-05	1	23	N. Dubey et al., https://doi.org/10.1002/polb.22206.
2,7-carbazole based copolymers [B]		4e-05	1	87	-
2,7-carbazole based copolymers [C]		3.4e-05	1	160	-
C60: Cs2Co3 molar ratio 3%		0.0017	-1	4e-05	A. Barbot et al., http://dx.doi.org/10.1007/s10853-012-6824-1.
C60: Cs2Co3 molar ratio 4%		0.0013	-1	5e-05	-
C60: Cs2Co3 molar ratio 6%		0.0007	-1	0.1	-
C60: Cs2Co3 molar ratio 8%		0.0005	-1	0.3	-
C60: Cs2Co3 molar ratio 10%		0.0004	-1	0.6	-
C60: Cs2Co3 molar ratio 30%		0.0002	-1	6	-
C60: Cs2Co3 molar ratio 40%		0.0001	-1	8	-
C60 : W2(hpp)4 doping molar ratio 0.003		0.00055	-1	0.007	T. Menke et al., https://doi.org/10.1063/1.3689778.
C60 : W2(hpp)4 doping molar ratio 0.02		0.00038	-1	0.3	-
C60 : W2(hpp)4 doping molar ratio 0.09		0.00015	-1	2	-
C60 : W2(hpp)4 doping molar ratio 0.4		0.00012	-1	1.5	-
PPA_298K		0.000193	-1	0.101	J. Liua et al., https://doi.org/10.1016/j.nanoen.2018.07.056.
PDEG-1_298K		0.000294	-1	1.06	-
PTeEG-1_298K		0.000319	-1	2.27	-
PPEG-1_298K		0.000266	-1	1.38	-
A-DCV-DPPTT		0.000568	-1	3.1	D. Huang et al., https://doi.org/10.1021/jacs.7b05344.
Q-DCM-DPPTT		0.000383	-1	0.11	-
2DQTT-o-OD doped by (2-Cyc-DMBI-H)_298K		0.000387	1	0.18	D. Yuan et al., https://doi.org/10.1021/acsami.7b07282.
2DQTT-o-OD doped by (2-Cyc-DMBI-Me)2_298K		0.00055	1	1.1	-
2DQTT-o-OD doped by (2-Cyc-DMBI)2_298K		0.000409	1	0.43	-
PCBM_n-DMBI30mol/%		0.000248	-1	0.012	J. Liu et al., https://doi.org/10.1002/adma.201701641.
PTEG-1_n-DMBI40mol/%		0.000284	-1	2.05	-
pentacene_iodine_293K		6e-05	1	20	K. Hayashi et al., https://doi.org/10.1002/pssc.201000425.
PDI-1_n=2		0.00019	-1	0.001	B. Russ et al., https://doi.org/10.1002/adma.201306116.
PDI-2_n=4		0.0002	-1	0.01	-
PDI-3_n=6		0.00022	-1	0.5	-
NDI3HU-DTYM2		0.00056	-1	0.0099	F. Zhang et al., https://doi.org/10.1002/adfm.201404397.
NDI(2OD)(4tBuPh)-DTYM2		0.00032	-1	0.0053	-
(BEDT-TTF)Cu2Br4salts		0.00085	-1	0.03	H. Ito et al ., https://doi.org/10.1016/j.synthmet.2005.07.326.
TTF-Ni(mnt)2, (mnt = maleonitriledithiolato)		0.000655	-1	0.015	M.G. Miles et al., Inorganic Chemistry, Vol. 14, No. 10, 1975 2357 (1975)
C60_Cs2Co3_298K		0.0002	-1	8.6	M. Sumino et al., https://doi.org/10.1063/1.3631633.
2DQBT_N-DMBI		0.001741	-1	0.000119	D. Yuan et al., https://doi.org/10.1016/j.chempr.2019.02.010.
2DQTT_N-DMBI		0.000492	-1	0.17	-
2DQQT_N-DMBI		0.000173	-1	13.7	-
2DQPT_N-DMBI		0.000146	-1	2.73	-
2DQQT-S		0.000649	-1	0.0076	D. Yuan et al., https://doi.org/10.1002/anie.201814544.
2DQQT-Se		0.000209	-1	0.19	-
2DQTT-o-OD_303K		0.00041	-1	1.1e-06	D. Yuan et al., https://doi.org/10.1021/acsami.7b07282.
PTEG-2_doping_5wt%_n-DMBI_392.7K		0.00025	-1	13	J. Liu et al., https://doi.org/10.1038/s41467-020-19537-8.
NDI3HU-DTYM2_FET-geometry		0.00027	-1	0.7	F. Zhang et al., https://doi.org/10.1002/adfm.201404397.
NDI3HU-DTYM2_NH3&N2H4		0.00021	-1	0.92	-
NDI(2OD)(4t-BuPh)-DTYM2_FET-geometry		0.00018	-1	0.1	-
NDI(2OD)(4t-BuPh)-DTYM2_NH3&N2H4		0.00013	-1	0.85	-
NTCDA doped BEDT-TTF 1:45		0.0011	-1	1.6e-06	A. Nollau et al., https://doi.org/10.1063/1.373413.
NTCDA doped BEDT-TTF 1:95		0.00125	-1	7e-07	-
NTCDA doped BEDT-TTF 1:520		0.0013	-1	5.5e-07	-
NTCDA doped BEDT-TTF 1:1540		0.00185	-1	2.5e-07	-
ZnPc:F4-TCNQ_doping ratio 0.002_323K		0.0013	1	0.0004	B. Maennig et al., https://doi.org/10.1103/PhysRevB.64.195208.
ZnPc:F4-TCNQ_doping ratio 0.005_323K		0.00088	1	0.002	-
ZnPc:F4-TCNQ_doping ratio 0.01_323K		0.00087	1	0.007	-
ZnPc:F4-TCNQ_doping ratio 0.02_323K		0.00063	1	0.018	-
F4TCNQ(2nm)/Pentacene(6nm)/HMDS		0.000217	1	0.43	M. Sumino et al., A-COE, Seoul, Korea, Nov. 3-5, (2010)
Cs2CO3(5nm)/C60(30nm)/Dph-BDT(15nm)		9e-05	-1	7.387	-
Pentacene(0.2um)		0.0002	1	0.38	G.-H. Kim et al., https://doi.org/10.1063/1.3556622.
Pentacene(0.5um)		0.00085	1	0.0055	-
Pentacene(0.8um)		0.00105	1	0.004	-
Pentacene(6nm) doped F4TCNQ		0.0002	1	0.44	K Harada et al., https://doi.org/10.1063/1.3456394.
pentacene		4.7e-05	1	55	K Hayashi et al., https://doi.org/10.1063/1.3537831.
